# Supplementary material for: Multiple hierarchical dynamic interactions enabled a robust, stretchable and room temperature self-healing elastomer
Source: Royal Society of Chemistry journal article supplement (doi:10.1039/d3py00187c), 2023-01-01
Supplement: d3py00187c1.pdf [file d3py00187c1.pdf]

# Multiple Hierarchical Dynamic Interactions Enabled Robust, Stretchable and Room Temperature Self-Healing Elastomer

Jianfeng Fan <sup>a</sup>, Xinqin Zhou <sup>a</sup>, Yukun Chen <sup>a,b\*</sup>

<sup>a</sup> Lab of Advanced Elastomer, South China University of Technology, 381 Wushan Road, Tianhe District, Guangzhou, 510640, China

<sup>b</sup> Zhongshan Institute of Modern Industrial Technology, South China University of Technology, Zhongshan, 528437, China

\*Corresponding Author: cyk@scut.edu.cn

## 1. Supplementary Figures

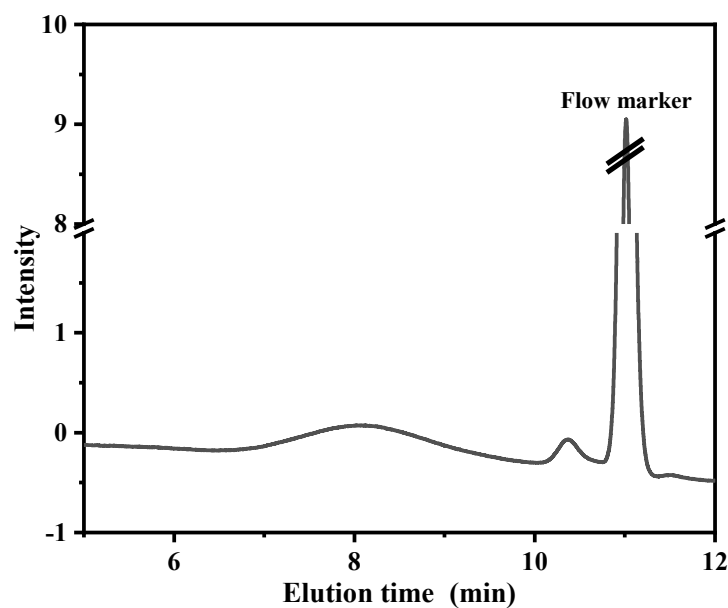

Fig. S1. GPC chromatograms of PID-0.

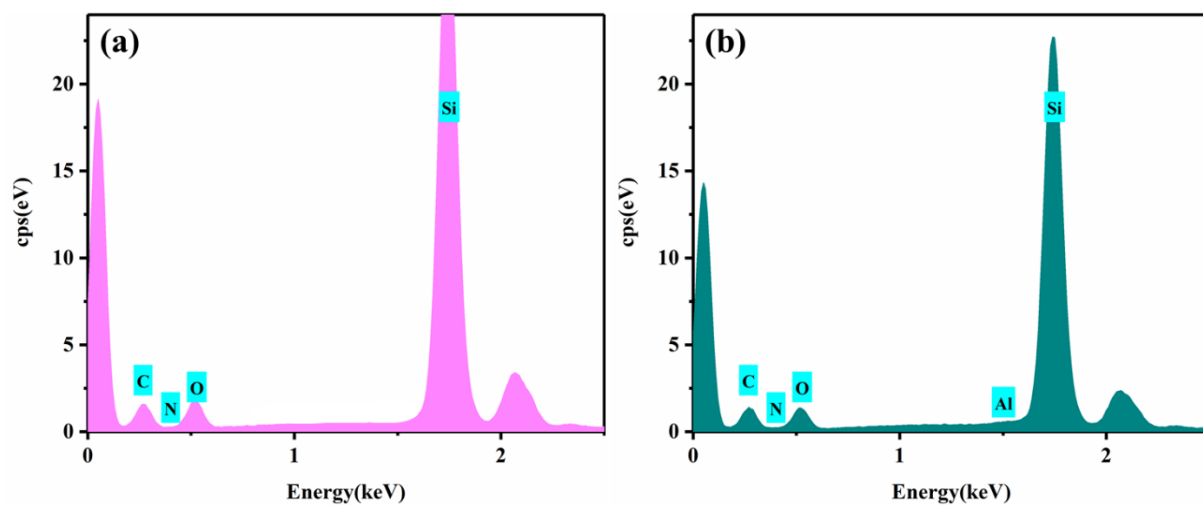

Fig. S2. EDX element detection of PID-x: (a) PID-0; (b) PID-1

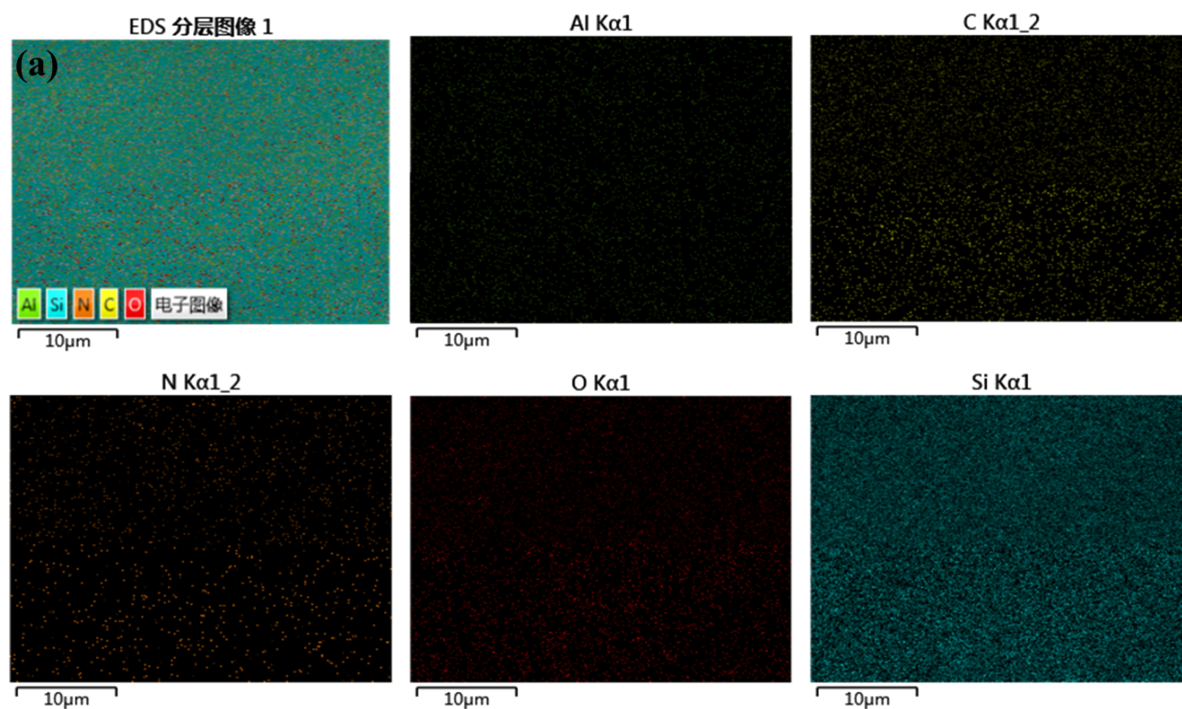

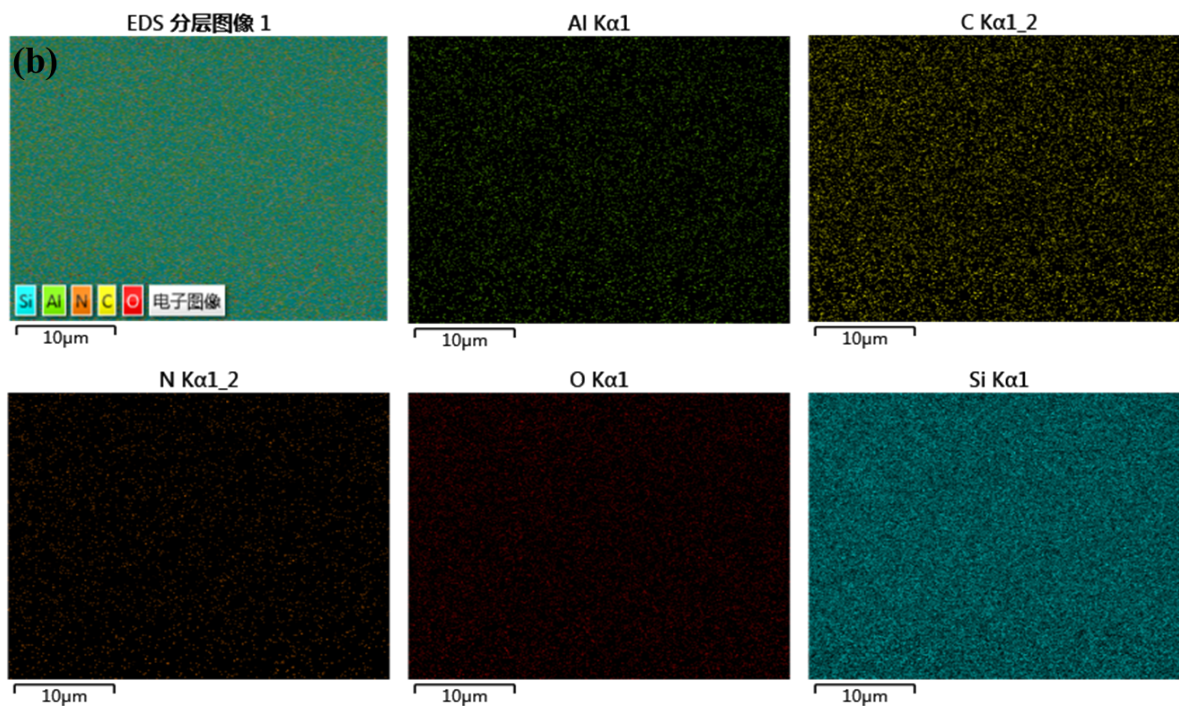

Fig. S3. Element mapping images of C, Si, O, N, Al: (a) PID-0; (b) PID-1

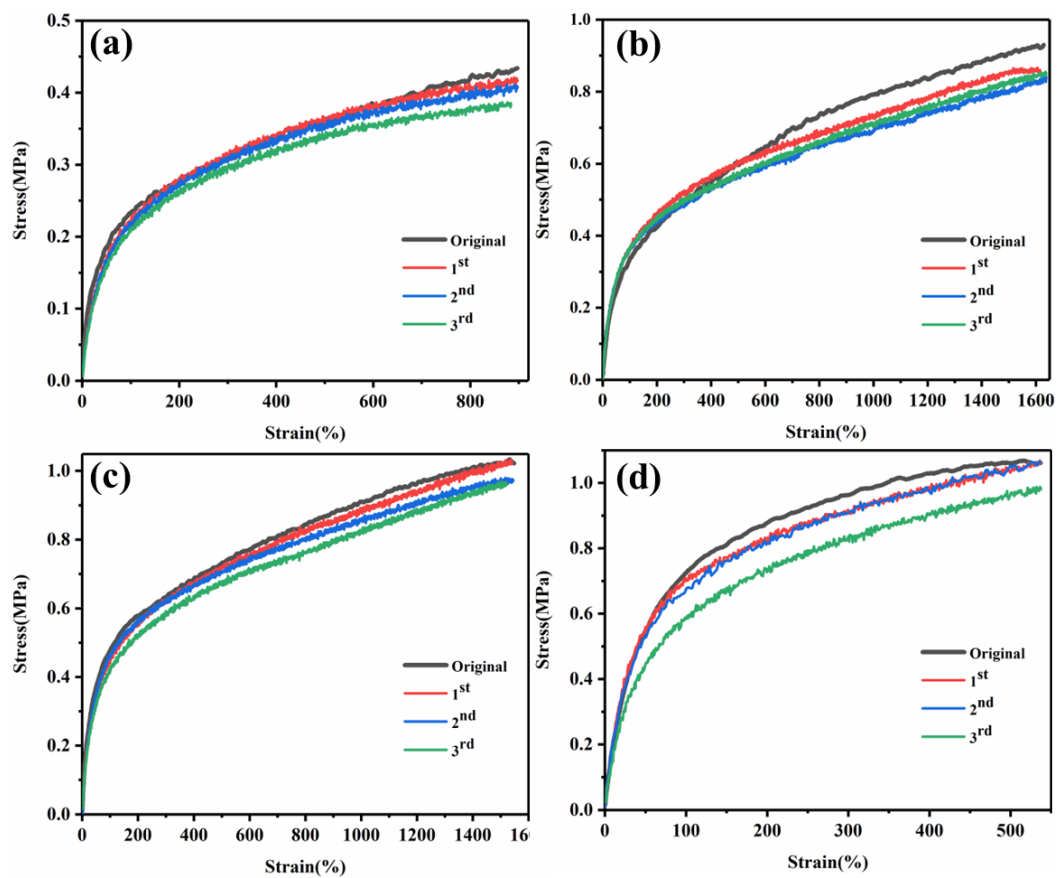

Fig. S4. Recyclable stress-strain curves of PID-x: (a) PID-0; (b) PID-1/2; (c) PID-1; (d) PID-2.

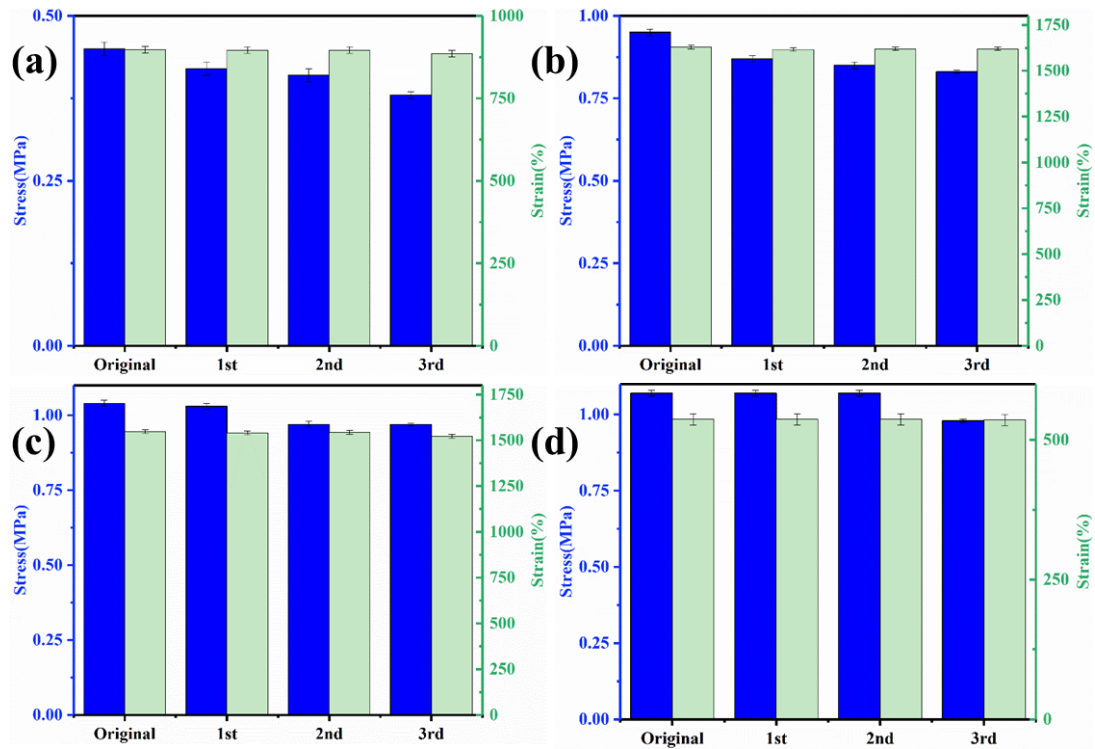

Fig. S5. The recyclable stress and strain histogram of PID-x: (a) PID-0; (b) PID-1/2; (c) PID-1; (d) PID-2.

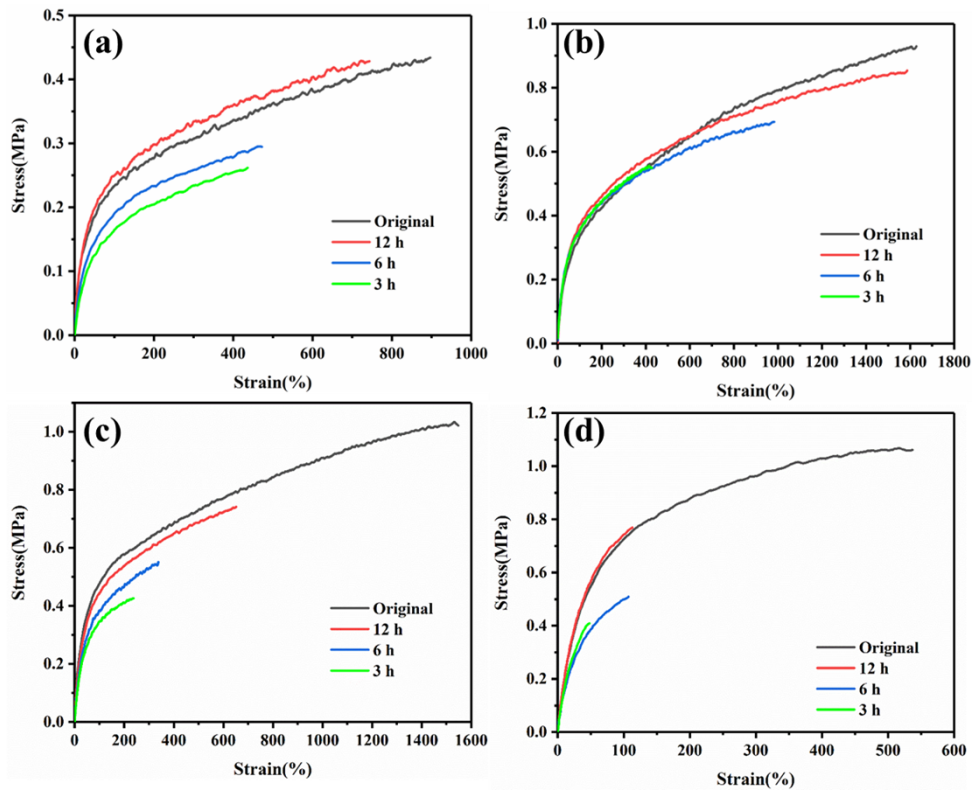

Fig. S6. Stress-strain curves of PID-x self-healing for 3 h, 6 h and 12 h at room temperature: (a) PID-0; (b) PID-1/2; (c) PID-1; (d) PID-2.

## 2. Supplementary Tables

Table S1. Compounding formulations of PIDx polysiloxane elastomers

| Sample  | PDMS<br>[mol] | IPDI<br>[mol] | DAP<br>[mol] | AlCl <sub>3</sub> ·6H <sub>2</sub> O<br>[mol] |
|---------|---------------|---------------|--------------|-----------------------------------------------|
| PID-0   | 3             | 4             | 1            | 0                                             |
| PID-1/3 | 3             | 4             | 1            | 1/3                                           |
| PID-1/2 | 3             | 4             | 1            | 1/2                                           |
| PID-1   | 3             | 4             | 1            | 1                                             |
| PID-2   | 3             | 4             | 1            | 2                                             |

In this work, PDMS components content was calculated according to the following equation, which is up to 82 wt%.

$$\text{PDMS components content (\%)} = \frac{\text{PDMS[g]}}{\text{IPDI [g]} + \text{DAP[g]} + \text{PDMS[g]}}$$

Table S2. Mechanical properties of PID-x elastomers

| Sample  | Fracture toughness<br>(MJ/m <sup>3</sup> ) | Tensile strength<br>(MPa) | Strain at break<br>(%) |
|---------|--------------------------------------------|---------------------------|------------------------|
| PID0    | 2.98 ± 0.2                                 | 0.45 ± 0.02               | 897 ± 16               |
| PID-1/3 | 7.21 ± 0.6                                 | 0.75 ± 0.03               | 1326 ± 22              |
| PID-1/2 | 11.14 ± 0.5                                | 0.95 ± 0.02               | 1629 ± 24              |
| PID-1   | 12.33 ± 0.8                                | 1.04 ± 0.03               | 1548 ± 21              |
| PID-2   | 4.67 ± 0.1                                 | 1.07 ± 0.02               | 537 ± 10               |
